# Supplementary material
Source: PubMed Central journal article supplement (PMC4788193)
Supplement: harm771725.ww2_default.pdf [file harm771725.ww2_default.pdf]

w<sup>1</sup>(Safavi 1992)  
w<sup>2</sup>(Happle, Hausen et al. 1983)  
w<sup>3</sup>(Muller and Winkelmann 1963)  
w<sup>4</sup>(Whiting 2003)  
w<sup>5</sup> (Goh, Finkel et al. 2006)  
w<sup>6</sup>(Ikeda 1965)  
w<sup>7</sup>(Ross and Shapiro 2005)  
w<sup>8</sup>(Lebwohl, Heymann et al. 2006)  
w<sup>9</sup>(Daman, Rosenberg et al. 1978)  
w<sup>10</sup>(Hull, Pepall et al. 1991)  
w<sup>11</sup>(Schuttelaar, Hamstra et al. 1996)  
w<sup>12</sup>(Tosti, De Padova et al. 1986)  
w<sup>13</sup>(Olsen, Carson et al. 1992)  
w<sup>14</sup>(Hubiche, Leaute-Labreze et al. 2008)  
w<sup>15</sup>(Fransway and Muller 1988)  
w<sup>16</sup>(Ranchoff, Bergfeld et al. 1989)  
w<sup>17</sup>(Vestey and Savin 1986)  
w<sup>18</sup>(Shapiro, Tan et al. 1993)  
w<sup>19</sup>(Whitmont and Cooper 2003)  
w<sup>20</sup>(Healy and Rogers 1993)  
w<sup>21</sup>(Taylor and Hawk 1995)  
w<sup>22</sup>(Gupta, Ellis et al. 1990)  
w<sup>23</sup>(Shapiro, Lui et al. 1997)  
w<sup>24</sup>(Joly 2006)  
w<sup>25</sup>(Rashidi and Mahd 2008)  
w<sup>26</sup>(Strober, Menon et al. 2009)  
w<sup>27</sup>(Price, Hordinsky et al. 2008)  
w<sup>28</sup>(Strober, Siu et al. 2005)  
w<sup>29</sup>(Abramovits and Losornio 2006)  
w<sup>30</sup>(Bissonnette, Shapiro et al. 2000)  
w<sup>31</sup>(Roseborough, Lee et al. 2009)  
w<sup>32</sup>(Ross, Bolduc et al. 2005)  
w<sup>33</sup>(Cartwright, Endean et al. 2009)  
w<sup>34</sup>(Tucker 2009)  
w<sup>35</sup>(Willemsen, Haentjens et al. 2010)  
w<sup>36</sup>(Harries, Trueb et al. 2009)  
w<sup>37</sup> (Petukhova, Duvic et al.)  
w<sup>38</sup>(Sun, Silva et al. 2008)  
w<sup>39</sup> (Ito, Ito et al. 2008)  
w<sup>40</sup>(Ross, Vincenzi et al. 2006)

## References

- Abramovits, W. and M. Losornio (2006). "Failure of two TNF-alpha blockers to influence the course of alopecia areata." *Skinmed* **5**(4): 177-81.
- Bissonnette, R., J. Shapiro, et al. (2000). "Topical photodynamic therapy with 5-aminolaevulinic acid does not induce hair regrowth in patients with extensive alopecia areata." *Br J Dermatol* **143**(5): 1032-5.
- Cartwright, T., N. Endean, et al. (2009). "Illness perceptions, coping and quality of life in patients with alopecia." *Br J Dermatol* **160**(5): 1034-9.
- Daman, L. A., E. W. Rosenberg, et al. (1978). "Treatment of alopecia areata with dinitrochlorobenzene." *Arch Dermatol* **114**(7): 1036-8.
- Fransway, A. F. and S. A. Muller (1988). "3 percent topical minoxidil compared with placebo for the treatment of chronic severe alopecia areata." *Cutis* **41**(6): 431-5.
- Goh, C., M. Finkel, et al. (2006). "Profile of 513 patients with alopecia areata: associations of disease subtypes with atopy, autoimmune disease and positive family history." *J Eur Acad Dermatol Venereol* **20**(9): 1055-60.
- Gupta, A. K., C. N. Ellis, et al. (1990). "Oral cyclosporine for the treatment of alopecia areata. A clinical and immunohistochemical analysis." *J Am Acad Dermatol* **22**(2 Pt 1): 242-50.
- Happle, R., B. M. Hausen, et al. (1983). "Diphencyprone in the treatment of alopecia areata." *Acta Derm Venereol* **63**(1): 49-52.
- Harries, M. J., R. M. Trueb, et al. (2009). "How not to get scar(r)ed: pointers to the correct diagnosis in patients with suspected primary cicatricial alopecia." *Br J Dermatol* **160**(3): 482-501.
- Healy, E. and S. Rogers (1993). "PUVA treatment for alopecia areata--does it work? A retrospective review of 102 cases." *Br J Dermatol* **129**(1): 42-4.
- Hubiche, T., C. Leaute-Labreze, et al. (2008). "Poor long term outcome of severe alopecia areata in children treated with high dose pulse corticosteroid therapy." *Br J Dermatol* **158**(5): 1136-7.
- Hull, S. M., L. Pepall, et al. (1991). "Alopecia areata in children: response to treatment with diphencyprone." *Br J Dermatol* **125**(2): 164-8.
- Ikeda, T. (1965). "A new classification of alopecia areata." *Dermatologica* **131**(6): 421-45.
- Ito, T., N. Ito, et al. (2008). "Maintenance of hair follicle immune privilege is linked to prevention of NK cell attack." *J Invest Dermatol* **128**(5): 1196-206.
- Joly, P. (2006). "The use of methotrexate alone or in combination with low doses of oral corticosteroids in the treatment of alopecia totalis or universalis." *J Am Acad Dermatol* **55**(4): 632-6.
- Lebwohl, M. G., W. R. Heymann, et al. (2006). *Treatment of skin disease: comprehensive therapeutic strategies*. Philadelphia, Mosby Elsevier.
- Muller, S. A. and R. K. Winkelmann (1963). "ALOPECIA AREATA. AN EVALUATION OF 736 PATIENTS." *Arch Dermatol* **88**: 290-7.
- Olsen, E. A., S. C. Carson, et al. (1992). "Systemic steroids with or without 2% topical minoxidil in the treatment of alopecia areata." *Arch Dermatol* **128**(11): 1467-73.
- Petukhova, L., M. Duvic, et al. "Genome-wide association study in alopecia areata implicates both innate and adaptive immunity." *Nature* **466**(7302): 113-7.
- Price, V. H., M. K. Hordinsky, et al. (2008). "Subcutaneous efalizumab is not effective in the treatment of alopecia areata." *J Am Acad Dermatol* **58**(3): 395-402.
- Ranchoff, R. E., W. F. Bergfeld, et al. (1989). "Extensive alopecia areata. Results of treatment with 3% topical minoxidil." *Cleve Clin J Med* **56**(2): 149-54.
- Rashidi, T. and A. A. Mahd (2008). "Treatment of persistent alopecia areata with sulfasalazine." *Int J Dermatol* **47**(8): 850-2.

- Roseborough, I., H. Lee, et al. (2009). "Lack of efficacy of topical latanoprost and bimatoprost ophthalmic solutions in promoting eyelash growth in patients with alopecia areata." J Am Acad Dermatol **60**(4): 705-6.
- Ross, E. K., C. Bolduc, et al. (2005). "Lack of efficacy of topical latanoprost in the treatment of eyebrow alopecia areata." J Am Acad Dermatol **53**(6): 1095-6.
- Ross, E. K. and J. Shapiro (2005). "Management of hair loss." Dermatol Clin **23**(2): 227-43.
- Ross, E. K., C. Vincenzi, et al. (2006). "Videodermoscopy in the evaluation of hair and scalp disorders." J Am Acad Dermatol **55**(5): 799-806.
- Safavi, K. (1992). "Prevalence of alopecia areata in the First National Health and Nutrition Examination Survey." Arch Dermatol **128**(5): 702.
- Schuttelaar, M. L., J. J. Hamstra, et al. (1996). "Alopecia areata in children: treatment with diphencyprone." Br J Dermatol **135**(4): 581-5.
- Shapiro, J., H. Lui, et al. (1997). "Systemic cyclosporine and low-dose prednisone in the treatment of chronic severe alopecia areata: a clinical and immunopathologic evaluation." J Am Acad Dermatol **36**(1): 114-7.
- Shapiro, J., J. Tan, et al. (1993). "Treatment of chronic severe alopecia areata with topical diphenylcyclopropenone and 5% minoxidil: a clinical and immunopathologic evaluation." J Am Acad Dermatol **29**(5 Pt 1): 729-35.
- Strober, B. E., K. Menon, et al. (2009). "Alefacept for severe alopecia areata: a randomized, double-blind, placebo-controlled study." Arch Dermatol **145**(11): 1262-6.
- Strober, B. E., K. Siu, et al. (2005). "Etanercept does not effectively treat moderate to severe alopecia areata: an open-label study." J Am Acad Dermatol **52**(6): 1082-4.
- Sun, J., K. A. Silva, et al. (2008). "The C3H/HeJ mouse and DEBR rat models for alopecia areata: review of preclinical drug screening approaches and results." Exp Dermatol **17**(10): 793-805.
- Taylor, C. R. and J. L. Hawk (1995). "PUVA treatment of alopecia areata partialis, totalis and universalis: audit of 10 years' experience at St John's Institute of Dermatology." Br J Dermatol **133**(6): 914-8.
- Tosti, A., M. P. De Padova, et al. (1986). "Therapies versus placebo in the treatment of patchy alopecia areata." J Am Acad Dermatol **15**(2 Pt 1): 209-10.
- Tucker, P. (2009). "Bald is beautiful?: the psychosocial impact of alopecia areata." J Health Psychol **14**(1): 142-51.
- Vestey, J. P. and J. A. Savin (1986). "A trial of 1% minoxidil used topically for severe alopecia areata." Acta Derm Venereol **66**(2): 179-80.
- Whiting, D. A. (2003). "Histopathologic features of alopecia areata: a new look." Arch Dermatol **139**(12): 1555-9.
- Whitmont, K. J. and A. J. Cooper (2003). "PUVA treatment of alopecia areata totalis and universalis: a retrospective study." Australas J Dermatol **44**(2): 106-9.
- Willemsen, R., P. Haentjens, et al. (2010). "Hypnosis in refractory alopecia areata significantly improves depression, anxiety, and life quality but not hair regrowth." J Am Acad Dermatol **62**(3): 517-8.
